# Supplementary material
Source: MDPI journal article supplement (https://www.mdpi.com/2306-5710/9/3/65)
Supplement: s1 [file s1]

# Supplementary Materials

## Analysis of the Volatile Organic Compounds fingerprint of Greek grape marc spirits of various origins and traditional production styles

**Maria Marinaki<sup>1,2,3</sup>, Ioannis Sampsonidis<sup>3,4</sup>, Alexandros Nakas<sup>5,6</sup>, Panagiotis Arapitsas<sup>7,8\*</sup>, Andreana Assimopoulou<sup>5,6</sup>, Georgios Theodoridis<sup>1,2,3\*</sup>**

<sup>1</sup> Department of Chemistry, Aristotle University of Thessaloniki, 54124 Thessaloniki, Greece; mmarinaki@chem.auth.gr

<sup>2</sup> Biomic\_Auth, Bioanalysis and Omics Laboratory, CIRI-AUTH, 57001 Thessaloniki, Greece

<sup>3</sup> FoodOmicsGR\_Research Infrastructure, Auth Node, CIRI-AUTH, 57001 Thessaloniki, Greece; isampson@nutr.teithe.gr

<sup>4</sup> Department of Nutritional Sciences & Dietetics, International Hellenic University, 57001 Thessaloniki, Greece

<sup>5</sup> Laboratory of Organic Chemistry, School of Chemical Engineering, Aristotle University of Thessaloniki, 54124 Thessaloniki, Greece; anakas@cheng.auth.gr (A.N.); adreana@cheng.auth.gr (A.N.A.)

<sup>6</sup> Natural Products Research Centre of Excellence (NatPro-AUTH), CIRI-AUTH, 57001 Thessaloniki, Greece

<sup>7</sup> Department of Wine, Vine and Beverage Sciences, School of Food Science, University of West Attica, 12243 Athens, Greece; parapitsas@uniwa.gr

<sup>8</sup> Research and Innovation Centre, Fondazione Edmund Mach, 38010 Trento, Italy; panagiotis.arapitsas@fmach.it

\*Correspondence: gtheodor@chem.auth.gr, panagiotis.arapitsas@fmach.it

**Table S1.** Sample number, region, grape variety and addition of aromatic material of the analyzed samples.

| Sample Number | Region                     | Grape variety                  | Addition of aromatic material |
|---------------|----------------------------|--------------------------------|-------------------------------|
| 1             | South Aegean, Crete Island | Liatiko                        | no                            |
| 2             | South Aegean, Crete Island | Liatiko                        | no                            |
| 3             | South Aegean, Crete Island | Liatiko-Kotsifali              | no                            |
| 4             | South Aegean, Crete Island | Liatiko-Kotsifali              | no                            |
| 5             | South Aegean, Crete Island | Liatiko-Mandilari              | no                            |
| 6             | South Aegean, Crete Island | Soultanina                     | yes                           |
| 7             | South Aegean, Crete Island | Soultanina                     | no                            |
| 8             | South Aegean, Crete Island | Soultanina                     | no                            |
| 9             | South Aegean, Crete Island | Soultanina                     | no                            |
| 10            | South Aegean, Crete Island | Soultanina                     | no                            |
| 11            | South Aegean, Crete Island | Soultanina                     | no                            |
| 12            | South Aegean, Crete Island | Soultanina                     | no                            |
| 13            | South Aegean, Crete Island | Soultanina                     | no                            |
| 14            | South Aegean, Crete Island | Soultanina                     | no                            |
| 15            | South Aegean, Crete Island | Soultanina                     | no                            |
| 16            | South Aegean, Crete Island | Soultanina                     | no                            |
| 17            | South Aegean, Crete Island | Soultanina-Liatiko-Kotsifali   | no                            |
| 18            | South Aegean, Crete Island | Soultanina-Liatiko-Kotsifali   | no                            |
| 19            | South Aegean, Crete Island | Soultanina- Kotsifali-Cabernet | no                            |
| 20            | South Aegean, Crete Island | Soultanina-Liatiko-Mandilari   | no                            |
| 21            | South Aegean, Crete Island | Soultanina-Kotsifali-Mandilari | no                            |
| 22            | South Aegean, Crete Island | Soultanina-Kotsifali-Mandilari | no                            |
| 23            | South Aegean, Crete Island | Liatiko-Mandilari              | no                            |
| 24            | South Aegean, Crete Island | Liatiko-Mandilari              | no                            |
| 25            | South Aegean, Crete Island | Mandilari-Syrah-Cabernet       | yes                           |
| 26            | South Aegean, Crete Island | Soultanina-Muscat              | no                            |
| 27            | South Aegean, Crete Island | Syrah                          | no                            |
| 28            | Macedonia, Thessaloniki    | Muscat                         | yes                           |
| 29            | Macedonia, Thessaloniki    | Muscat                         | yes                           |
| 30            | Macedonia, Thessaloniki    | Muscat                         | yes                           |
| 31            | Macedonia, Thessaloniki    | Muscat                         | yes                           |
| 32            | Macedonia, Thessaloniki    | Muscat                         | no                            |
| 33            | Macedonia, Thessaloniki    | Muscat-Roditis-Merlot          | yes                           |
| 34            | Macedonia, Thessaloniki    | Muscat-Roditis-Merlot          | yes                           |
| 35            | Macedonia, Thessaloniki    | Muscat-Roditis-Merlot          | yes                           |
| 36            | Macedonia, Pella           | Merlot-Grand noir-Cabernet     | no                            |
| 37            | Macedonia, Pella           | Merlot-Grand noir-Cabernet     | no                            |
| 38            | Macedonia, Pella           | Merlot-Grand noir-Cabernet     | no                            |
| 39            | Macedonia, Pella           | Merlot-Grand noir-Cabernet     | no                            |
| 40            | Macedonia, Kavala          | Soultanina                     | yes                           |
| 41            | Macedonia, Kilkis          | Muscat                         | yes                           |
| 42            | Macedonia, Nea Mesimvria   | Muscat                         | yes                           |
| 43            | Macedonia, Litohoro        | Muscat                         | yes                           |
| 44            | Macedonia, Serres          | Muscat                         | yes                           |
| 45            | Macedonia, Serres          | Muscat                         | yes                           |
| 46            | Macedonia, Serres          | Muscat                         | yes                           |
| 47            | Macedonia, Serres          | Muscat-Cabernet                | yes                           |

|    |                             |                      |     |
|----|-----------------------------|----------------------|-----|
| 48 | Thessaly, Tyrnavos          | Muscat               | yes |
| 49 | Thessaly, Larissa           | Muscat               | yes |
| 50 | Thessaly, Tyrnavos          | Muscat-Cabernet      | yes |
| 51 | Cyprus                      | Soultanina           | no  |
| 52 | North Aegean, Limnos Island | Muscat of Alexandria | yes |
| 53 | North Aegean, Limnos Island | Muscat of Alexandria | yes |
| 54 | North Aegean, Limnos Island | Muscat of Alexandria | yes |
| 55 | North Aegean, Limnos Island | Muscat of Alexandria | yes |
| 56 | North Aegean, Limnos Island | Muscat of Alexandria | yes |
| 57 | North Aegean, Limnos Island | Muscat of Alexandria | yes |
| 58 | North Aegean, Limnos Island | Muscat of Alexandria | yes |
| 59 | North Aegean, Limnos Island | Muscat of Alexandria | yes |
| 60 | North Aegean, Limnos Island | Muscat of Alexandria | yes |

**Table S2.** Compound name, retention time (RT), chemical formula, molecular weight (MR) and relative concentration (mg L<sup>-1</sup>) according to the production region of the metabolites identified in analyzed Greek distillates

| Compound name                       | RT<br>(min) | Chemical<br>Formula | MR     | Crete                   | Thessaloniki | Limnos      | Pella      | Serres      | Thessaly    | Cyprus             | Kavala | Kilkis | Nea<br>Mesimvria | Litohoro |
|-------------------------------------|-------------|---------------------|--------|-------------------------|--------------|-------------|------------|-------------|-------------|--------------------|--------|--------|------------------|----------|
| ACIDS                               |             |                     |        | mg L <sup>-1</sup> ± sd |              |             |            |             |             | mg L <sup>-1</sup> |        |        |                  |          |
| Acetic acid                         | 16.82       | C2H4O2              | 60.05  | 3.61±2.51               | 6.26±3.32    | 0.67±0.54   | 2.63±0.42  | 3.49±5.88   | 10.53±17.38 | 5.80               | 1.19   | 10.30  | 1.29             | 2.04     |
| Octanoic acid                       | 38.44       | C8H16O2             | 144.21 | 0.05±0.04               | 0.66±1.61    | 0.64±1.44   | 0.04±0.01  | 0.07±0.03   | 9.15±15.00  | 0.07               | 0.07   | 0.11   | 0.01             | 0.04     |
| Decanoic acid                       | 43.29       | C10H20O2            | 172.26 | 0.14±0.50               | 4.21±11.41   | 2.44±5.83   | 0.02±0.01  | 0.18±0.32   | 8.98±15.43  | 0.02               | 0.02   | 0.04   | 0.01             | 0.02     |
| ALCOHOLS                            |             |                     |        |                         |              |             |            |             |             |                    |        |        |                  |          |
| 2-Methylpropan-1-ol                 | 4.33        | C4H10O              | 74.12  | 6.86±2.91               | 13.33±5.29   | 11.08±2.23  | 7.38±0.41  | 11.60±3.42  | 6.90±11.09  | 27.04              | 13.36  | 19.21  | 21.34            | 9.51     |
| 1-Butanol                           | 5.45        | C4H10O              | 74.12  | 0.44±0.23               | 0.44±0.07    | 0.45±0.18   | 0.40±0.04  | 0.33±0.10   | 0.19±0.24   | 9.23               | 0.31   | 0.29   | 0.38             | 0.55     |
| Isoamyl alcohol                     | 7.19        | C5H12O              | 88.15  | 56.17±25.03             | 66.97±19.72  | 76.41±14.74 | 50.13±6.60 | 91.75±28.54 | 33.25±38.69 | 235.27             | 74.16  | 137.10 | 162.54           | 99.80    |
| 1-Hexanol                           | 12.50       | C6H14O              | 102.17 | 1.11±0.58               | 1.85±1.49    | 1.10±0.27   | 0.33±0.07  | 1.05±0.42   | 1.18±0.54   | 2.42               | 1.69   | 2.97   | 1.82             | 1.85     |
| 1-Heptanol                          | 16.69       | C7H16O              | 116.20 | 0.07±0.03               | 0.10±0.08    | 0.11±0.02   | 0.06±0.01  | 0.06±0.02   | 0.10±0.09   | 0.15               | 0.09   | 0.07   | 0.11             | 0.17     |
| cis-Hept-4-enol                     | 18.64       | C7H14O              | 114.18 | 0.05±0.16               | 0.06±0.07    | 0.22±0.12   | 0.04±0.01  | 0.11±0.19   | 0.03±0.02   | 0.03               | 0.31   | 0.04   | 0.04             | 0.04     |
| 1-Octanol                           | 20.83       | C8H18O              | 130.22 | 0.09±0.05               | 0.09±0.04    | 0.08±0.03   | 0.06±0.02  | 0.06±0.02   | 0.15±0.17   | 0.13               | 0.09   | 0.10   | 0.08             | 0.13     |
| 2,6-dimethyl-3,7-Octadiene-2,6-diol | 29.09       | C10H18O2            | 170.25 | 0.00±0.00               | 0.01±0.00    | 0.01±0.00   | 0.01±0.00  | 0.01±0.01   | 0.05±0.07   | 0.01               | 0.01   | 0.00   | 0.00             | 0.01     |
| 2-Phenylethanol                     | 33.52       | C8H10O              | 122.16 | 12.86±6.78              | 7.20±3.15    | 10.03±14.93 | 6.65±1.16  | 8.08±5.50   | 16.13±14.65 | 10.23              | 10.28  | 22.70  | 7.10             | 15.39    |
| CARBONYL COMPOUNDS                  |             |                     |        |                         |              |             |            |             |             |                    |        |        |                  |          |
| Acetaldehyde                        | 1.34        | C2H4O               | 44.05  | 1.30±0.72               | 1.14±0.51    | 1.26±0.63   | 0.78±0.20  | 1.34±0.70   | 2.10±3.64   | 0.33               | 0.55   | 1.83   | 0.40             | 1.31     |
| 2-Heptanone                         | 1.62        | C7H14O              | 114.19 | 0.14±0.13               | 0.27±0.21    | 0.23±0.14   | 0.08±0.01  | 3.01±4.95   | 0.14±0.23   | 0.44               | 0.16   | 0.14   | 1.62             | 0.41     |
| Acetaldehyde ethyl methyl acetal    | 1.74        | C5H12O2             | 104.15 | 1.10±0.58               | 0.94±0.40    | 0.24±0.24   | 0.67±0.12  | 0.52±0.59   | 1.63±2.80   | 0.12               | 0.26   | 1.59   | 0.25             | 1.31     |
| Isovaleraldehyde diethyl acetal     | 4.05        | C9H20O2             | 160.25 | 0.27±0.20               | 1.15±0.96    | 0.45±0.31   | 0.15±0.01  | 0.55±0.8    | 0.10±0.18   | 0.22               | 0.24   | 0.38   | 0.13             | 0.85     |
| Acetaldehyde ethyl amyl acetal      | 4.66        | C9H20O2             | 160.25 | 0.32±0.21               | 0.28±0.13    | 0.34±0.22   | 0.13±0.03  | 0.43±0.33   | 0.47±0.81   | 0.11               | 0.17   | 1.01   | 0.38             | 0.65     |
| 3-Ethoxypropanal diethyl acetal     | 10.67       | C9H20O3             | 176.25 | 0.03±0.02               | 0.06±0.04    | 0.02±0.01   | 0.03±0.01  | 0.03±0.03   | 0.02±0.01   | 0.07               | 0.03   | 0.05   | 0.03             | 0.02     |
| Nonanal                             | 14.07       | C9H18O              | 142.24 | 0.05±0.03               | 0.06±0.03    | 0.11±0.03   | 0.03±0.01  | 0.09±0.06   | 0.03±0.03   | 0.06               | 0.08   | 0.08   | 0.10             | 0.07     |
| Furfural                            | 16.98       | C5H4O2              | 96.08  | 1.12±0.70               | 0.88±0.15    | 1.18±0.46   | 0.43±0.12  | 0.68±0.26   | 0.14±0.11   | 11.58              | 0.55   | 0.54   | 0.42             | 1.32     |
| Benzaldehyde                        | 19.05       | C7H6O               | 106.12 | 0.85±0.52               | 1.48±0.96    | 0.83±0.19   | 0.52±0.08  | 0.49±0.18   | 0.27±0.23   | 3.18               | 1.76   | 1.08   | 0.28             | 0.75     |
| Nonanal diethyl acetal              | 19.67       | C13H28O2            | 216.36 | 0.06±0.05               | 0.12±0.12    | 0.15±0.09   | 0.04±0.02  | 0.21±0.30   | 0.06±0.05   | 0.08               | 0.15   | 0.13   | 0.12             | 0.12     |
| 4-Anisaldehyde                      | 36.90       | C8H8O2              | 136.15 | 4.21±14.42              | 18.88±47.07  | 22.11±33.42 | 0.54±0.36  | 18.13±22.29 | 11.95±19.58 | 0.02               | 0.42   | 9.70   | 0.05             | 0.08     |
| 2-Allyl-1,4-dimethoxybenzene        | 37.57       | C11H14O2            | 178.22 | 0.03±0.09               | 0.03±0.06    | 0.48±0.40   | 0.02±0.01  | 0.05±0.07   | 0.03±0.03   | 0.00               | 0.00   | 0.01   | 0.00             | 0.00     |

|                                            |       |          |        |             |              |              |             |               |               |       |        |        |       |       |
|--------------------------------------------|-------|----------|--------|-------------|--------------|--------------|-------------|---------------|---------------|-------|--------|--------|-------|-------|
| 2-(4-Hexyl-2,5-dioxofuran-3-yl)acetic acid | 39.09 | C12H16O5 | 240.25 | 0.06±0.11   | 0.54±1.19    | 0.81±1.06    | 0.02±0.01   | 0.10±0.11     | 0.94±1.52     | 0.08  | 0.08   | 0.05   | 0.01  | 0.02  |
| <i>p</i> -Anisaldehyde diethyl acetal      | 42.01 | C10H14O3 | 182.22 | 0.37±1.36   | 8.97±24.11   | 5.16±13.22   | 0.02±0.01   | 0.70±0.99     | 17.65±30.54   | 0.00  | 0.01   | 0.15   | 0.00  | 0.00  |
| ESTERS                                     |       |          |        |             |              |              |             |               |               |       |        |        |       |       |
| Methyl acetate                             | 1.67  | C3H6O2   | 74.08  | 0.27±0.21   | 0.43±0.28    | 0.47±0.23    | 0.20±0.03   | 0.91±1.16     | 0.56±0.97     | 0.34  | 0.45   | 0.38   | 0.56  | 0.45  |
| Ethyl Acetate                              | 1.96  | C4H8O2   | 88.11  | 82.12±48.94 | 119.76±90.71 | 137.48±85.36 | 61.66±8.39  | 223.49±320.78 | 205.49±353.79 | 55.55 | 130.87 | 215.48 | 27.99 | 61.87 |
| Ethyl butyrate                             | 3.43  | C6H12O2  | 116.16 | 1.39±2.09   | 0.38±0.16    | 0.39±0.20    | 0.60±0.08   | 0.68±0.30     | 0.37±0.61     | 4.99  | 0.56   | 0.40   | 1.15  | 0.90  |
| Ethyl 2-methylbutanoate                    | 3.65  | C7H14O2  | 130.18 | 0.34±0.22   | 0.10±0.05    | 0.20±0.15    | 0.06±0.01   | 0.14±0.09     | 0.12±0.18     | 0.15  | 0.07   | 0.79   | 0.53  | 0.22  |
| Ethyl isovalerate                          | 3.92  | C7H14O2  | 130.18 | 0.35±0.25   | 0.16±0.10    | 0.03±0.01    | 0.06±0.01   | 0.12±0.2      | 0.27±0.44     | 0.18  | 0.05   | 1.18   | 0.04  | 0.20  |
| Isoamyl acetate                            | 4.99  | C7H14O2  | 130.18 | 1.63±0.89   | 2.34±0.70    | 2.91±0.81    | 1.35±0.05   | 4.13±3.64     | 2.87±4.76     | 3.26  | 2.52   | 7.02   | 2.20  | 2.42  |
| Ethyl hexanoate                            | 8.02  | C8H16O2  | 144.21 | 2.96±1.36   | 2.97±1.28    | 2.48±1.23    | 2.42±0.41   | 3.07±1.86     | 1.94±2.88     | 2.23  | 4.37   | 4.50   | 2.80  | 6.96  |
| Neryl hexanoate                            | 11.31 | C16H28O2 | 252.39 | 0.02±0.03   | 0.40±0.33    | 0.23±0.14    | 0.13±0.03   | 0.09±0.08     | 0.12±0.17     | 0.03  | 0.06   | 0.02   | 0.05  | 0.07  |
| Ethyl heptanoate                           | 11.75 | C9H18O2  | 158.24 | 0.10±0.07   | 0.13±0.07    | 0.11±0.04    | 0.07±0.02   | 0.07±0.06     | 0.05±0.07     | 0.10  | 0.21   | 0.14   | 0.12  | 0.14  |
| Ethyl lactate                              | 12.12 | C5H10O3  | 118.13 | 2.21±1.34   | 6.78±1.92    | 2.08±1.52    | 3.79±0.63   | 2.49±1.54     | 0.99±1.12     | 5.02  | 7.34   | 3.21   | 1.28  | 2.63  |
| Ethyl octanoate                            | 15.84 | C10H20O2 | 172.26 | 20.81±25.95 | 38.35±10.48  | 14.65±5.78   | 29.77±5.45  | 30.26±20.85   | 15.52±25.47   | 21.99 | 76.68  | 43.26  | 31.43 | 6.45  |
| Ethyl nonanoate                            | 19.94 | C11H22O2 | 186.29 | 0.42±0.39   | 1.00±1.01    | 0.27±0.15    | 0.31±0.07   | 0.23±0.16     | 0.18±0.25     | 0.32  | 0.71   | 0.57   | 0.37  | 0.12  |
| Ethyl 2-hydroxy-4-methylvalerate           | 20.23 | C8H16O3  | 160.21 | 0.03±0.02   | 0.13±0.13    | 0.04±0.01    | 0.03±0.01   | 0.04±0.02     | 0.05±0.06     | 0.09  | 0.09   | 0.06   | 0.05  | 0.02  |
| Methyl 9-oxononanoate                      | 22.23 | C10H18O3 | 186.25 | 0.16±0.33   | 0.37±0.16    | 0.10±0.03    | 0.19±0.05   | 0.17±0.11     | 0.12±0.16     | 0.13  | 0.87   | 0.34   | 0.16  | 0.06  |
| Ethyl decanoate                            | 23.96 | C12H24O2 | 200.32 | 36.31±66.69 | 88.10±39.22  | 38.50±15.99  | 80.86±21.21 | 54.55±29.96   | 25.37±37.18   | 56.49 | 25.68  | 125.02 | 41.81 | 11.74 |
| 3-Methylbutyl octanoate                    | 24.67 | C13H26O2 | 214.34 | 0.47±1.80   | 0.65±0.46    | 0.41±0.14    | 0.8±0.59    | 0.66±0.64     | 0.07±0.07     | 0.22  | 0.02   | 0.38   | 0.73  | 0.14  |
| Ethyl phenylacetate                        | 29.24 | C10H12O2 | 164.20 | 0.09±0.13   | 0.35±0.48    | 0.17±0.08    | 0.06±0.02   | 0.21±0.24     | 0.37±0.35     | 0.17  | 0.63   | 0.20   | 0.14  | 0.22  |
| Phenethyl acetate                          | 30.26 | C10H12O2 | 164.20 | 0.11±0.12   | 0.29±0.19    | 0.84±0.52    | 0.14±0.04   | 0.97±0.62     | 0.76±0.98     | 0.40  | 0.63   | 0.24   | 0.26  | 0.24  |
| Ethyl dodecanoate                          | 31.43 | C14H28O2 | 228.37 | 3.91±8.47   | 10.80±6.80   | 12.12±5.90   | 9.94±4.96   | 7.49±6.16     | 2.41±1.80     | 6.53  | 30.77  | 10.63  | 1.47  | 3.44  |
| Isoamyl decanoate                          | 32.05 | C15H30O2 | 242.40 | 0.12±0.37   | 0.20±0.17    | 0.27±0.22    | 0.22±0.22   | 0.19±0.22     | 0.06±0.07     | 0.10  | 0.99   | 0.10   | 0.05  | 0.10  |
| Ethyl myristate                            | 38.03 | C16H32O2 | 256.42 | 0.07±0.16   | 0.38±0.48    | 0.47±0.37    | 0.14±0.12   | 0.18±0.18     | 0.14±0.21     | 0.06  | 0.57   | 0.07   | 0.00  | 0.07  |
| Ethyl palmitate                            | 42.83 | C18H36O2 | 284.50 | 0.03±0.05   | 0.45±0.68    | 0.43±0.52    | 0.04±0.02   | 0.10±0.08     | 0.24±0.40     | 0.03  | 0.13   | 0.02   | 0.01  | 0.02  |
| TERPENES AND TERPENOIDS                    |       |          |        |             |              |              |             |               |               |       |        |        |       |       |
| <i>alpha</i> -Pinene                       | 3.18  | C10H16   | 136.23 | 0.06±0.27   | 0.02±0.02    | 0.44±0.60    | 0.01±0.00   | 49.64±99.24   | 0.00±0.00     | 0.01  | 2.87   | 0.00   | 0.00  | 0.06  |
| <i>beta</i> -Myrcene                       | 5.95  | C10H16   | 136.23 | 0.02±0.04   | 0.05±0.03    | 0.25±0.21    | 0.03±0.01   | 15.04±30.06   | 0.04±0.06     | 0.00  | 1.53   | 0.02   | 0.01  | 0.02  |
| D-Limonene                                 | 6.84  | C10H16   | 136.23 | 0.29±1.19   | 1.26±0.62    | 0.24±0.09    | 0.25±0.10   | 90.05±179.91  | 0.32±0.54     | 0.01  | 45.24  | 1.85   | 0.09  | 1.24  |
| 4-Carene                                   | 8.28  | C10H16   | 136.23 | 0.07±0.21   | 0.10±0.05    | 0.29±0.13    | 0.04±0.01   | 8.55±17.05    | 0.05±0.07     | 0.01  | 6.28   | 0.57   | 0.03  | 0.06  |
| o-Cymene                                   | 9.17  | C10H14   | 134.22 | 0.22±0.89   | 0.51±0.26    | 1.15±0.55    | 0.13±0.05   | 9.89±19.54    | 0.07±0.08     | 0.02  | 12.76  | 3.37   | 0.07  | 0.19  |
| <i>alpha</i> -Terpinene                    | 9.59  | C10H16   | 136.23 | 0.02±0.04   | 0.19±0.14    | 0.08±0.05    | 0.05±0.01   | 2.02±4.02     | 0.11±0.15     | 0.01  | 0.67   | 0.13   | 0.02  | 0.03  |

|                                      |       |          |        |            |           |             |           |             |           |      |       |       |       |      |
|--------------------------------------|-------|----------|--------|------------|-----------|-------------|-----------|-------------|-----------|------|-------|-------|-------|------|
| <i>alpha</i> -Terpineol              | 16.05 | C10H18O  | 154.25 | 0.14±0.12  | 1.66±1.28 | 0.29±0.15   | 0.52±0.08 | 1.42±2.48   | 1.94±3.22 | 0.38 | 1.17  | 2.85  | 0.12  | 0.58 |
| Cedrene                              | 16.54 | C15H24   | 204.35 | 0.25±0.11  | 0.34±0.18 | 0.29±0.12   | 0.37±0.08 | 0.23±0.20   | 0.19±0.31 | 0.46 | 0.19  | 0.30  | 0.62  | 0.22 |
| Nerol oxide                          | 17.06 | C10H16O  | 152.23 | 0.03±0.02  | 0.29±0.20 | 0.32±0.12   | 0.07±0.01 | 0.06±0.06   | 0.08±0.07 | 0.29 | 0.07  | 0.04  | 0.02  | 0.14 |
| Ylangene                             | 17.26 | C15H24   | 204.35 | 0.11±0.39  | 0.08±0.11 | 1.09±0.65   | 0.03±0.01 | 0.22±0.42   | 0.01±0.01 | 0.01 | 0.48  | 0.04  | 0.04  | 0.01 |
| <i>cis</i> -Sesquisabinene hydrate   | 17.60 | C15H26O  | 222.36 | 0.02±0.03  | 0.11±0.07 | 0.13±0.04   | 0.04±0.01 | 0.08±0.10   | 0.14±0.23 | 0.05 | 0.11  | 0.05  | 0.01  | 0.06 |
| 2-Bornanone                          | 18.38 | C10H16O  | 152.23 | 0.01±0.01  | 0.02±0.01 | 0.05±0.03   | 0.01±0.00 | 0.14±0.26   | 0.05±0.07 | 0.02 | 0.29  | 0.05  | 0.01  | 0.03 |
| Geraniol                             | 18.93 | C10H18O  | 154.25 | 0.04±0.03  | 0.38±0.24 | 0.22±0.10   | 0.12±0.03 | 0.07±0.06   | 0.72±1.14 | 0.09 | 0.08  | 0.14  | 0.03  | 0.11 |
| Linalool                             | 20.52 | C10H18O  | 154.25 | 0.06±0.20  | 2.38±1.52 | 3.96±1.94   | 0.94±0.23 | 0.98±1.50   | 1.74±2.69 | 0.11 | 0.38  | 0.03  | 0.24  | 1.73 |
| Caryophyllene                        | 21.65 | C15H24   | 204.35 | 0.06±0.13  | 0.04±0.01 | 0.41±0.24   | 0.05±0.01 | 0.27±0.48   | 0.04±0.03 | 0.06 | 0.30  | 0.06  | 0.07  | 0.05 |
| Terpinen-4-ol                        | 22.25 | C10H18O  | 154.25 | 0.03±0.03  | 0.07±0.04 | 0.07±0.02   | 0.03±0.01 | 0.48±0.87   | 3.73±6.41 | 0.04 | 1.06  | 0.16  | 0.02  | 0.10 |
| <i>trans</i> -Sesquisabinene hydrate | 22.71 | C15H26O  | 222.36 | 0.01±0.01  | 0.45±0.48 | 0.02±0.01   | 0.03±0.03 | 0.03±0.03   | 0.02±0.02 | 0.02 | 0.11  | 0.01  | 0.01  | 0.02 |
| Hotrienol                            | 22.95 | C10H16O  | 152.23 | 0.01±0.01  | 0.22±0.15 | 1.76±1.05   | 0.12±0.03 | 0.19±0.28   | 0.22±0.33 | 0.01 | 0.08  | 0.01  | 0.03  | 0.21 |
| <i>alpha</i> -Himachalene            | 23.28 | C15H24   | 204.35 | 0.13±0.51  | 0.05±0.01 | 1.69±0.98   | 0.04±0.01 | 0.06±0.05   | 0.04±0.03 | 0.09 | 0.07  | 0.05  | 0.04  | 0.04 |
| <i>gamma</i> -Himalachene            | 25.31 | C15H24   | 204.35 | 3.98±19.12 | 0.40±0.80 | 38.65±21.78 | 0.39±0.24 | 1.57±2.94   | 0.67±1.09 | 0.02 | 0.10  | 0.09  | 0.02  | 0.02 |
| <i>alpha</i> -Cedrene                | 25.94 | C15H24   | 204.35 | 0.66±3.17  | 0.07±0.08 | 6.39±3.96   | 0.06±0.03 | 0.25±0.45   | 0.14±0.13 | 0.02 | 0.05  | 0.03  | 0.01  | 0.02 |
| <i>alpha</i> -Zingiberene            | 26.77 | C15H24   | 204.35 | 0.09±0.38  | 0.04±0.05 | 3.36±2.46   | 0.04±0.02 | 0.16±0.29   | 0.06±0.07 | 0.02 | 0.07  | 0.04  | 0.01  | 0.27 |
| Isolongifolene                       | 27.06 | C15H24   | 202.33 | 0.05±0.21  | 0.02±0.03 | 1.51±0.93   | 0.02±0.01 | 0.02±0.04   | 0.07±0.07 | 0.01 | 0.02  | 0.01  | 0.01  | 0.01 |
| <i>alpha</i> -Cadinene               | 27.90 | C15H24   | 204.35 | 0.17±0.56  | 0.12±0.07 | 0.70±0.42   | 0.14±0.10 | 0.69±1.32   | 0.05±0.08 | 0.01 | 1.63  | 0.21  | 0.05  | 0.11 |
| <i>alpha</i> -Curcumene              | 28.69 | C15H22   | 202.34 | 0.81±3.93  | 0.05±0.08 | 2.82±1.55   | 0.06±0.04 | 0.56±1.03   | 0.06±0.11 | 0.01 | 0.04  | 0.02  | 0.01  | 0.01 |
| <i>gamma</i> -Isogeraniol            | 29.45 | C10H18O  | 154.25 | 0.01±0.01  | 0.02±0.01 | 0.02±0.01   | 0.02±0.00 | 0.01±0.01   | 0.06±0.09 | 0.01 | 0.01  | 0.01  | 0.01  | 0.02 |
| 4,5,9,10-dehydro-Isolongifolene      | 31.60 | C15H20   | 200.32 | 0.03±0.11  | 0.01±0.00 | 0.05±0.02   | 0.01±0.00 | 0.01±0.00   | 0.05±0.04 | 0.00 | 0.01  | 0.01  | 0.00  | 0.00 |
| <i>gamma</i> -Dehydro-ar-himachalene | 32.77 | C15H20   | 200.32 | 0.06±0.28  | 0.00±0.01 | 0.16±0.08   | 0.01±0.01 | 0.06±0.10   | 0.01±0.01 | 0.00 | 0.00  | 0.00  | 0.00  | 0.00 |
| <i>beta</i> -Calacorene              | 33.35 | C15H20   | 200.32 | 0.13±0.52  | 0.05±0.03 | 0.43±0.24   | 0.04±0.02 | 0.22±0.39   | 0.03±0.04 | 0.01 | 0.15  | 0.07  | 0.02  | 0.02 |
| OTHERS                               |       |          |        |            |           |             |           |             |           |      |       |       |       |      |
| epi-Nepeta lactone                   | 3.78  | C10H14O2 | 166.22 | 0.01±0.01  | 0.01±0.00 | 0.02±0.02   | 0.01±0.00 | 0.71±1.42   | 0.00±0.00 | 0.00 | 0.21  | 0.02  | 0.00  | 0.01 |
| Mesitylene                           | 8.25  | C9H12    | 120.19 | 0.75±0.26  | 0.43±0.15 | 0.32±0.06   | 0.36±0.03 | 1.65±2.29   | 0.57±0.26 | 0.05 | 1.31  | 0.44  | 0.38  | 0.65 |
| 3-Acetylphenol                       | 9.60  | C8H8O2   | 136.15 | 0.02±0.04  | 0.22±0.17 | 0.09±0.05   | 0.06±0.02 | 2.07±4.11   | 0.14±0.19 | 0.02 | 0.69  | 0.17  | 0.02  | 0.03 |
| Fenchone                             | 13.79 | C10H16O  | 152.23 | 0.01±0.01  | 0.03±0.02 | 0.03±0.01   | 0.01±0.00 | 13.85±27.55 | 0.16±0.25 | 0.03 | 34.89 | 3.60  | 0.02  | 0.02 |
| 1,3-Di-tert-butylbenzene             | 15.46 | C14H22   | 190.32 | 0.01±0.02  | 0.01±0.01 | 0.02±0.03   | 0.01±0.00 | 10.45±7.94  | 0.02±0.02 | 0.01 | 0.01  | 0.00  | 16.35 | 9.12 |
| Styrene                              | 15.74 | C8H8     | 104.15 | 0.01±0.01  | 0.08±0.05 | 0.02±0.01   | 0.03±0.00 | 0.18±0.30   | 0.03±0.02 | 0.01 | 0.25  | 0.21  | 0.03  | 0.02 |
| Thymol methyl ether                  | 19.38 | C11H16O  | 164.24 | 0.02±0.01  | 0.01±0.00 | 0.01±0.00   | 0.01±0.00 | 0.01±0.00   | 0.05±0.07 | 0.12 | 0.01  | 0.02  | 0.01  | 0.01 |
| Menthol                              | 23.78 | C10H20O  | 156.26 | 0.05±0.05  | 0.13±0.11 | 0.10±0.04   | 0.18±0.15 | 0.13±0.11   | 0.12±0.12 | 0.03 | 0.01  | 0.07  | 0.26  | 1.66 |
| Estragole                            | 24.91 | C10H12O  | 148.20 | 1.95±8.24  | 0.68±0.16 | 27.33±9.26  | 0.14±0.06 | 31.10±60.84 | 0.45±0.19 | 0.03 | 2.94  | 22.45 | 0.35  | 9.96 |

|                                                                                |       |         |        |              |             |                |             |               |             |      |       |        |      |      |
|--------------------------------------------------------------------------------|-------|---------|--------|--------------|-------------|----------------|-------------|---------------|-------------|------|-------|--------|------|------|
| Aromandendrene                                                                 | 26.40 | C15H24  | 204.35 | 0.05±0.11    | 0.04±0.03   | 2.23±1.25      | 0.05±0.02   | 0.06±0.08     | 0.04±0.05   | 0.01 | 0.13  | 0.05   | 0.02 | 0.02 |
| Carvone                                                                        | 26.91 | C10H14O | 150.22 | 0.05±0.22    | 0.02±0.02   | 0.36±0.72      | 0.01±0.00   | 1.36±2.68     | 0.86±1.16   | 0.01 | 0.70  | 1.57   | 0.01 | 2.18 |
| <i>trans-p</i> -Mentha-1(7), 8-dien-2-ol                                       | 29.63 | C10H16O | 152.23 | 0.00±0.00    | 0.01±0.01   | 0.01±0.01      | 0.00±0.00   | 0.01±0.01     | 0.06±0.09   | 0.01 | 0.02  | 0.01   | 0.00 | 0.00 |
| 4,4-Dimethyl-3- (3-methylbut-3-enylidene) -2-methylene-bicyclo [4,1,0] heptane | 30.17 | C15H22  | 202.33 | 0.08±0.34    | 0.03±0.03   | 0.68±0.40      | 0.03±0.02   | 0.07±0.11     | 0.02±0.03   | 0.01 | 0.07  | 0.02   | 0.02 | 0.01 |
| Anethole                                                                       | 30.64 | C10H12O | 148.20 | 71.77±253.90 | 36.24±44.19 | 1317.91±673.69 | 31.20±20.23 | 604.01±751.25 | 35.23±43.97 | 0.62 | 14.64 | 130.84 | 3.54 | 6.84 |
| 2,4-Di-tert-butylphenol                                                        | 44.13 | C14H22O | 206.32 | 0.07±0.06    | 0.17±0.15   | 0.36±0.59      | 0.06±0.04   | 0.20±0.14     | 0.15±0.17   | 0.14 | 0.13  | 0.02   | 0.04 | 0.11 |

**Table S3.** VIP, p(corr) and *p*-values of the statistically significant volatile metabolites of the discrimination between Crete-Soultanina and Macedonia Greek grape marc spirits.

| Compound Name                   | VIP    | p(corr) | <i>p</i> -value        |
|---------------------------------|--------|---------|------------------------|
| Ethyl acetate                   | 3.4693 | 0.5227  | 0.0297                 |
| Ethyl decanoate                 | 3.2993 | 0.7166  | $3.33 \times 10^{-8}$  |
| Isoamyl alcohol                 | 2.0860 | -0.5933 | 0.0336                 |
| Anethole                        | 1.9373 | 0.5217  | 0.0154                 |
| Estragole                       | 1.6440 | -0.4977 | 0.0244                 |
| 2-Phenylethanol                 | 1.5368 | -0.5890 | 0.0158                 |
| Ethyl octanoate                 | 0.9902 | 0.4925  | $2.85 \times 10^{-7}$  |
| Acetic acid                     | 0.7771 | 0.5905  | 0.0343                 |
| Linalool                        | 0.7000 | 0.6687  | $4.72 \times 10^{-14}$ |
| D-Limonene                      | 0.6631 | -0.5153 | $5.61 \times 10^{-14}$ |
| <i>alpha</i> -Terpineol         | 0.6449 | 0.6921  | $2.95 \times 10^{-11}$ |
| Fenchone                        | 0.6323 | -0.5497 | 0.0214                 |
| Furfural                        | 0.5605 | -0.5539 | 0.0598                 |
| Ethyl lactate                   | 0.5585 | 0.5092  | $1.85 \times 10^{-7}$  |
| Ethyl dodecanoate               | 0.5559 | 0.5364  | $8.83 \times 10^{-7}$  |
| 2-Methylpropan-1-ol             | 0.5369 | 0.4960  | 0.0575                 |
| Isoamyl acetate                 | 0.5117 | 0.5325  | 0.0062                 |
| Isovaleraldehyde diethyl acetal | 0.5028 | 0.5803  | 0.0711                 |
| <i>o</i> -Cymene                | 0.5013 | -0.4966 | $3.98 \times 10^{-7}$  |
| Ethyl butyrate                  | 0.5013 | -0.5629 | 0.0301                 |

**Table S4.** VIP, p(corr) and *p*-values of the statistically significant volatile metabolites of the discrimination between Crete and Limnos Greek grape marc spirits.

| Compound Name             | VIP    | p(corr) | <i>p</i> -value       |
|---------------------------|--------|---------|-----------------------|
| Anethole                  | 7.3356 | 0.9038  | $2.36 \times 10^{-6}$ |
| <i>gamma</i> -Himalachene | 1.2662 | 0.8370  | $6.90 \times 10^{-6}$ |
| Ethyl acetate             | 1.2480 | -0.5091 | 0.0251                |
| Isoamyl alcohol           | 1.1911 | -0.5357 | 0.0065                |
| Estragole                 | 1.0744 | 0.9073  | $7.27 \times 10^{-9}$ |
| 4-Anisaldehyde            | 0.9042 | 0.5725  | 0.0247                |
| Ethyl octanoate           | 0.6793 | -0.6096 | 0.0485                |
| 2-Phenylethanol           | 0.6621 | -0.5580 | 0.0322                |
| Ethyl dodecanoate         | 0.6053 | 0.7259  | $1.15 \times 10^{-5}$ |
| <i>alpha</i> -Cedrene     | 0.5141 | 0.8004  | $2.10 \times 10^{-5}$ |

**Table S5.** VIP, p(corr) and *p*-values of the statistically significant volatile metabolites of the discrimination between Macedonia and Limnos Greek grape marc spirits.

| Compound Name             | VIP    | p(corr) | <i>p</i> -value       |
|---------------------------|--------|---------|-----------------------|
| Anethole                  | 7.0784 | -0.8799 | 0.0014                |
| Ethyl decanoate           | 1.6646 | 0.5899  | 0.0002                |
| Ethyl octanoate           | 1.2598 | 0.8059  | $2.11 \times 10^{-6}$ |
| <i>gamma</i> -Himalachene | 1.2094 | -0.7895 | 0.0026                |
| Estragole                 | 1.0191 | -0.8709 | $7.69 \times 10^{-5}$ |
| 4-Anisaldehyde            | 0.8899 | -0.5234 | 0.0145                |
| Isoamyl alcohol           | 0.7035 | 0.5733  | 0.0191                |



|                                       |        |         |                       |
|---------------------------------------|--------|---------|-----------------------|
| Ethyl acetate                         | 0.6811 | 0.5445  | 0.0135                |
| Ethyl lactate                         | 0.5930 | 0.8382  | $7.26 \times 10^{-6}$ |
| Acetic acid                           | 0.5285 | 0.7181  | $2.11 \times 10^{-7}$ |
| <i>p</i> -Anisaldehyde diethyl acetal | 0.5192 | -0.5254 | 0.0261                |
| <i>alpha</i> -Cedrene                 | 0.5120 | -0.7522 | 0.0047                |
| 2-Methylpropan-1-ol                   | 0.5068 | 0.4914  | 0.0453                |
| <i>n</i> -Decanoic acid               | 0.5039 | -0.5516 | 0.02437               |
| Ethyl dodecanoate                     | 0.5034 | 0.5141  | 0.01198               |
| <i>alpha</i> -Terpineol               | 0.4977 | 0.7347  | $5.42 \times 10^{-9}$ |
| Aromandendrene                        | 0.4932 | -0.7919 | 0.0026                |
| Benzaldehyde                          | 0.4921 | 0.6821  | $3.41 \times 10^{-7}$ |
| D-Limonene                            | 0.4910 | 0.8087  | $3.32 \times 10^{-8}$ |

**Table S6.** VIP, p(corr) and *p*-values of the statistically significant volatile metabolites of the discrimination between Crete and Thessaloniki Greek grape marc spirits.

| Compound Name                         | VIP    | p(corr) | <i>p</i> -value       |
|---------------------------------------|--------|---------|-----------------------|
| Ethyl decanoate                       | 3.5260 | 0.6994  | 0.0230                |
| 2-Phenylethanol                       | 1.6494 | -0.5932 | 0.0150                |
| Ethyl octanoate                       | 1.5087 | 0.4928  | 0.0367                |
| 4-Anisaldehyde                        | 1.4975 | 0.5345  | 0.0817                |
| Ethyl dodecanoate                     | 1.4311 | 0.7455  | 0.0221                |
| Ethyl acetate                         | 1.1736 | 0.4931  | 0.0471                |
| <i>p</i> -Anisaldehyde diethyl acetal | 1.0809 | 0.5413  | 0.0343                |
| Isoamyl alcohol                       | 0.9599 | -0.5287 | 0.0136                |
| Anethole                              | 0.8110 | 0.6974  | 0.0305                |
| <i>n</i> -Decanoic acid               | 0.7505 | 0.5470  | 0.0344                |
| 2-Methylpropan-1-ol                   | 0.6961 | 0.5343  | $4.40 \times 10^{-5}$ |
| Linalool                              | 0.6455 | 0.7107  | $3.09 \times 10^{-9}$ |
| Ethyl lactate                         | 0.6292 | 0.5025  | $5.96 \times 10^{-9}$ |
| <i>alpha</i> -Terpineol               | 0.6280 | 0.6137  | $3.33 \times 10^{-9}$ |
| D-Limonene                            | 0.6648 | 0.6953  | 0.0173                |
| Isoamyl octanoate                     | 0.6590 | 0.7443  | 0.3888                |
| Furfural                              | 0.6322 | -0.5380 | 0.0179                |
| Ethyl myristate                       | 0.6276 | 0.65495 | 0.0031                |
| Ethyl palmitate                       | 0.5968 | 0.6783  | 0.0014                |
| Octanoic acid                         | 0.5949 | 0.5672  | 0.0277                |
| Ethyl nonanoate                       | 0.5896 | 0.5918  | 0.0098                |

**Table S7.** VIP, p(corr) and *p*-values of the statistically significant volatile metabolites of the discrimination between Thessaloniki and Limnos Greek grape marc spirits.

| Compound Name             | VIP    | p(corr) | <i>p</i> -value       |
|---------------------------|--------|---------|-----------------------|
| Anethole                  | 7.1815 | 0.9915  | $4.04 \times 10^{-5}$ |
| Ethyl decanoate           | 1.5870 | -0.6093 | 0.0016                |
| Ethyl octanoate           | 1.1235 | -0.7635 | $1.54 \times 10^{-5}$ |
| <i>gamma</i> -Himalachene | 1.0226 | 0.7487  | $8.80 \times 10^{-5}$ |
| Estragole                 | 0.8615 | 0.8114  | $3.66 \times 10^{-7}$ |
| Isoamyl alcohol           | 0.7614 | -0.5639 | 0.0138                |
| Ethyl acetate             | 0.5914 | -0.5408 | 0.0421                |

**Table S8.** VIP, p(corr) and *p*-values of the statistically significant volatile metabolites of the discrimination between Thessaloniki and Pella Greek grape marc spirits.

| Compound Name                         | VIP    | p(corr)  | <i>p</i> -value |
|---------------------------------------|--------|----------|-----------------|
| Ethyl acetate                         | 3.9473 | -0.5959  | 0.0120          |
| Ethyl decanoate                       | 2.3594 | -0.5874  | 0.0370          |
| Isoamyl alcohol                       | 2.3280 | -0.5763  | 0.0067          |
| Ethyl octanoate                       | 1.8796 | -0.5114  | 0.0480          |
| 4-Anisaldehyde                        | 1.7609 | -0.5202  | 0.0232          |
| 2-Methylpropan-1-ol                   | 1.2745 | -0.5320  | 0.0266          |
| <i>p</i> -Anisaldehyde diethyl acetal | 1.2176 | -0.5090  | 0.0244          |
| Anethole                              | 1.1020 | -0.7366  | 0.008           |
| Acetic acid                           | 0.8901 | -0.5786  | 0.0300          |
| Ethyl dodecanoate                     | 0.8722 | -0.5509  | 0.0414          |
| Ethyl lactate                         | 0.7877 | -0.5723  | 0.0071          |
| Isoamyl acetate                       | 0.5921 | -0.7284  | 0.0104          |
| 1-Hexanol                             | 0.5573 | -0.3510  | 0.0372          |
| D-Limonene                            | 0.5366 | -0.7249  | 0.0050          |
| Linalool                              | 0.5329 | -0.52164 | 0.0479          |
| Ethyl hexanoate                       | 0.5268 | -0.5350  | 0.0216          |
| <i>alpha</i> -Terpineol               | 0.5234 | -0.6172  | 0.0471          |
| Benzaldehyde                          | 0.5188 | -0.5785  | 0.0400          |

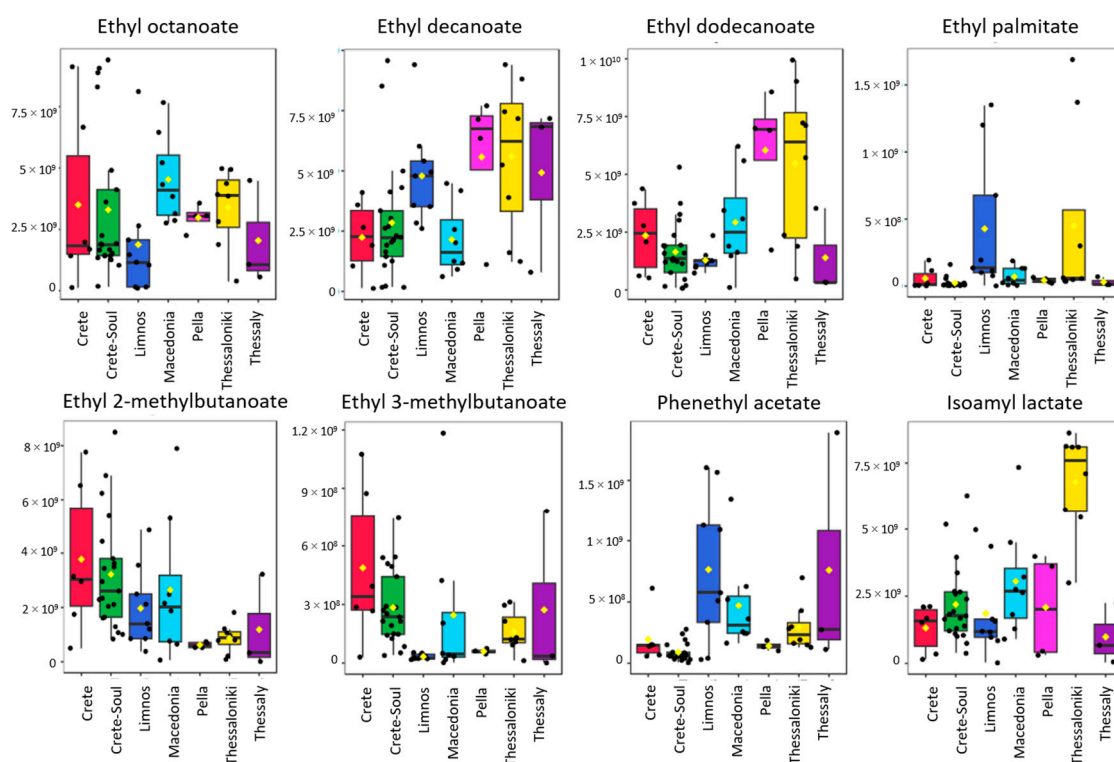

**Figure S1.** Boxplots of representative esters among Greek grape marc spirit samples. Black dots represent the samples' values and yellow dots are the mean values.

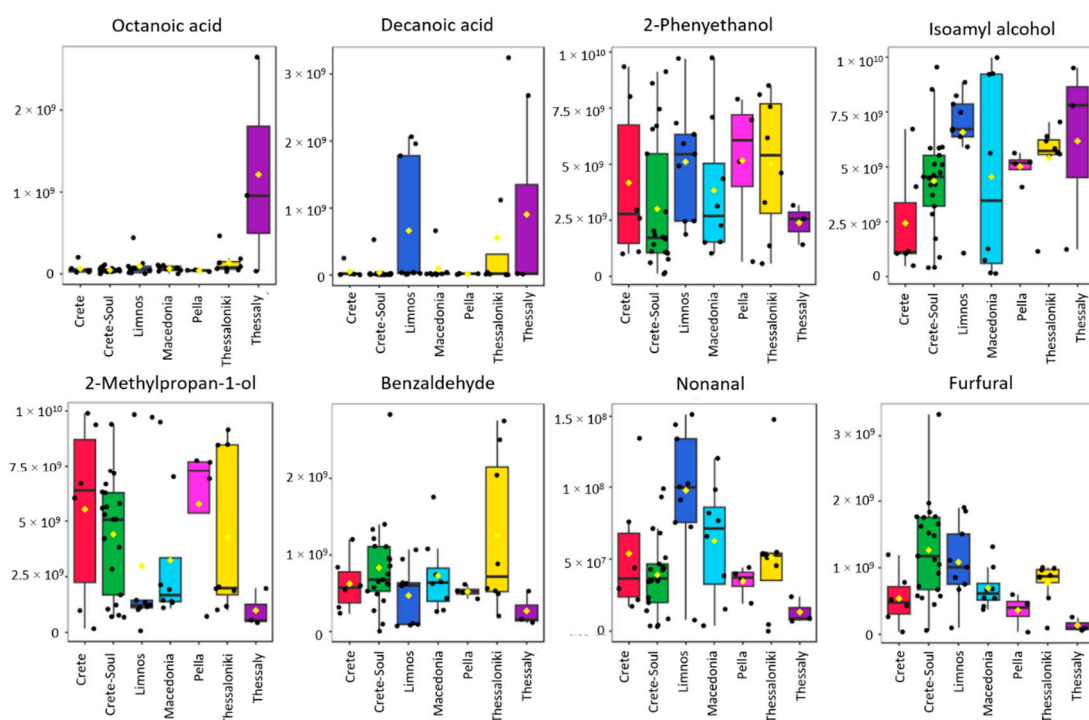

**Figure S2.** Boxplots of representative acids, alcohols and carbonyl compounds among Greek grape marc spirit samples. Black dots represent the samples' values and yellow dots are the mean values.

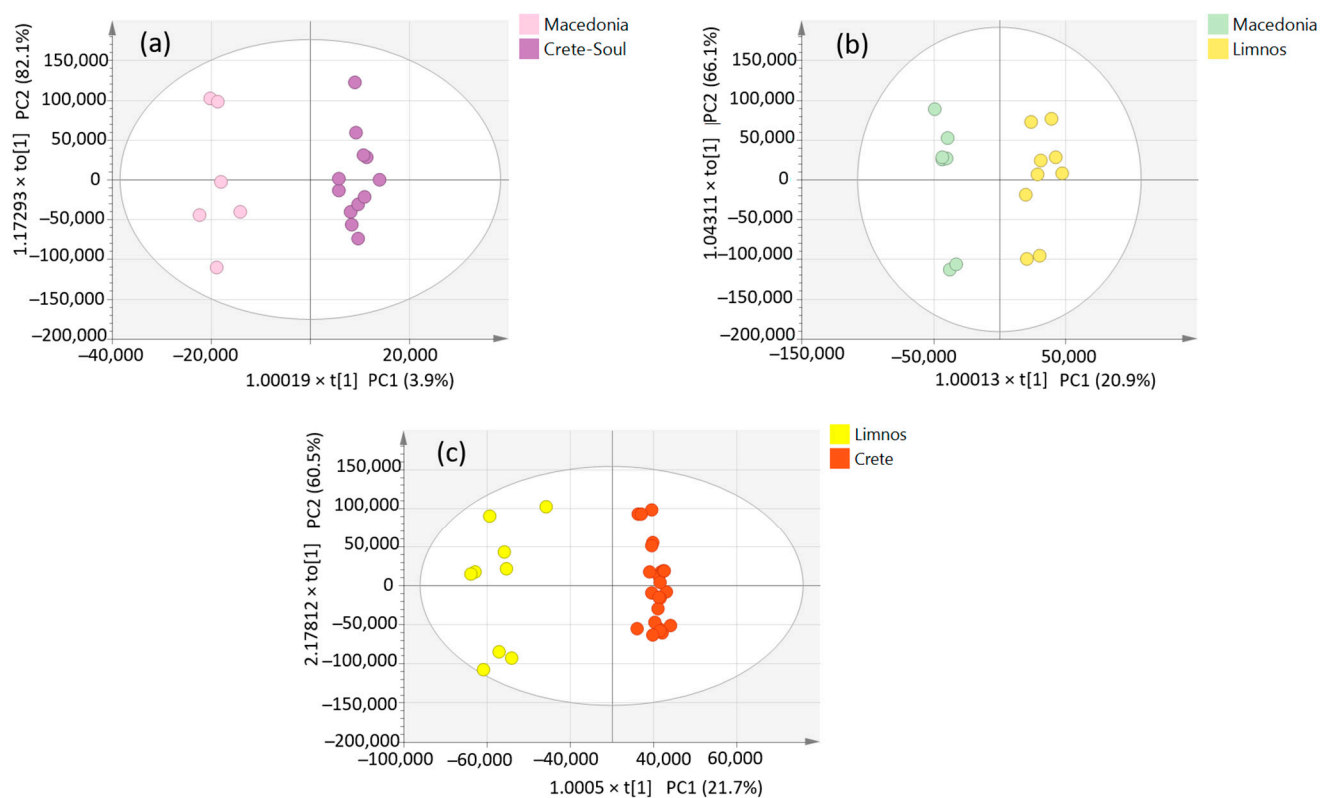

**Figure S3.** OPLS-DA score plots of the discrimination of (a) Macedonia and Crete-Soultanina, (b) Macedonia and Limnos and (c) Limnos and Crete grape marc spirit samples.

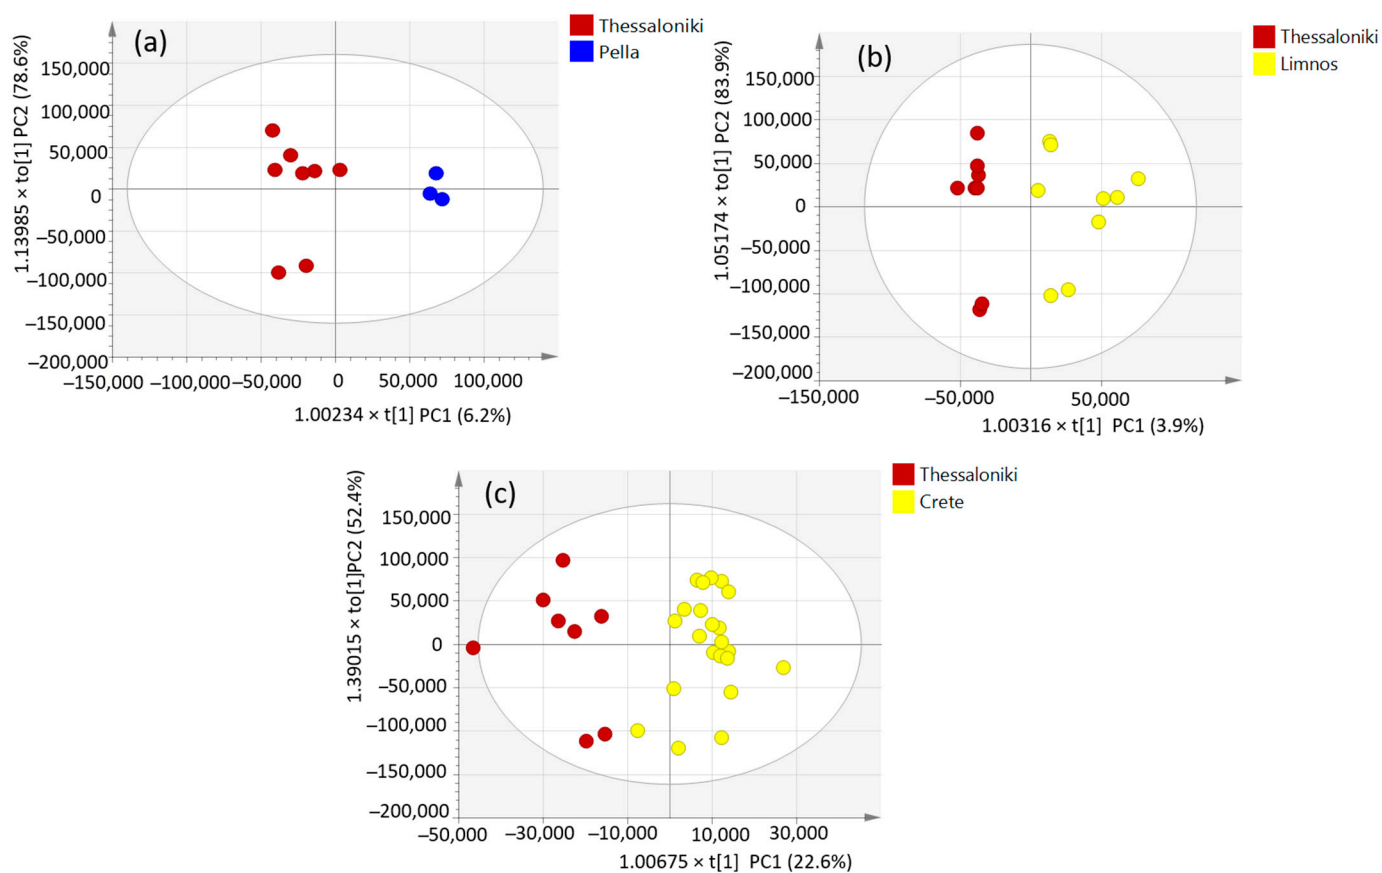

**Figure S4.** OPLS-DA score plots of the discrimination of (a) Thessaloniki and Pella, (b) Thessaloniki and Limnos and (c) Thessaloniki and Crete grape marc spirit samples.
